# Supplementary figures and images for: Comparative Analysis of Gut Bacterial Community Composition in Two Tropical Economic Sea Cucumbers under Different Seasons of Artificial Environment
Source: MDPI journal article supplement (doi:10.3390/ijms25084573), 2024-04-22

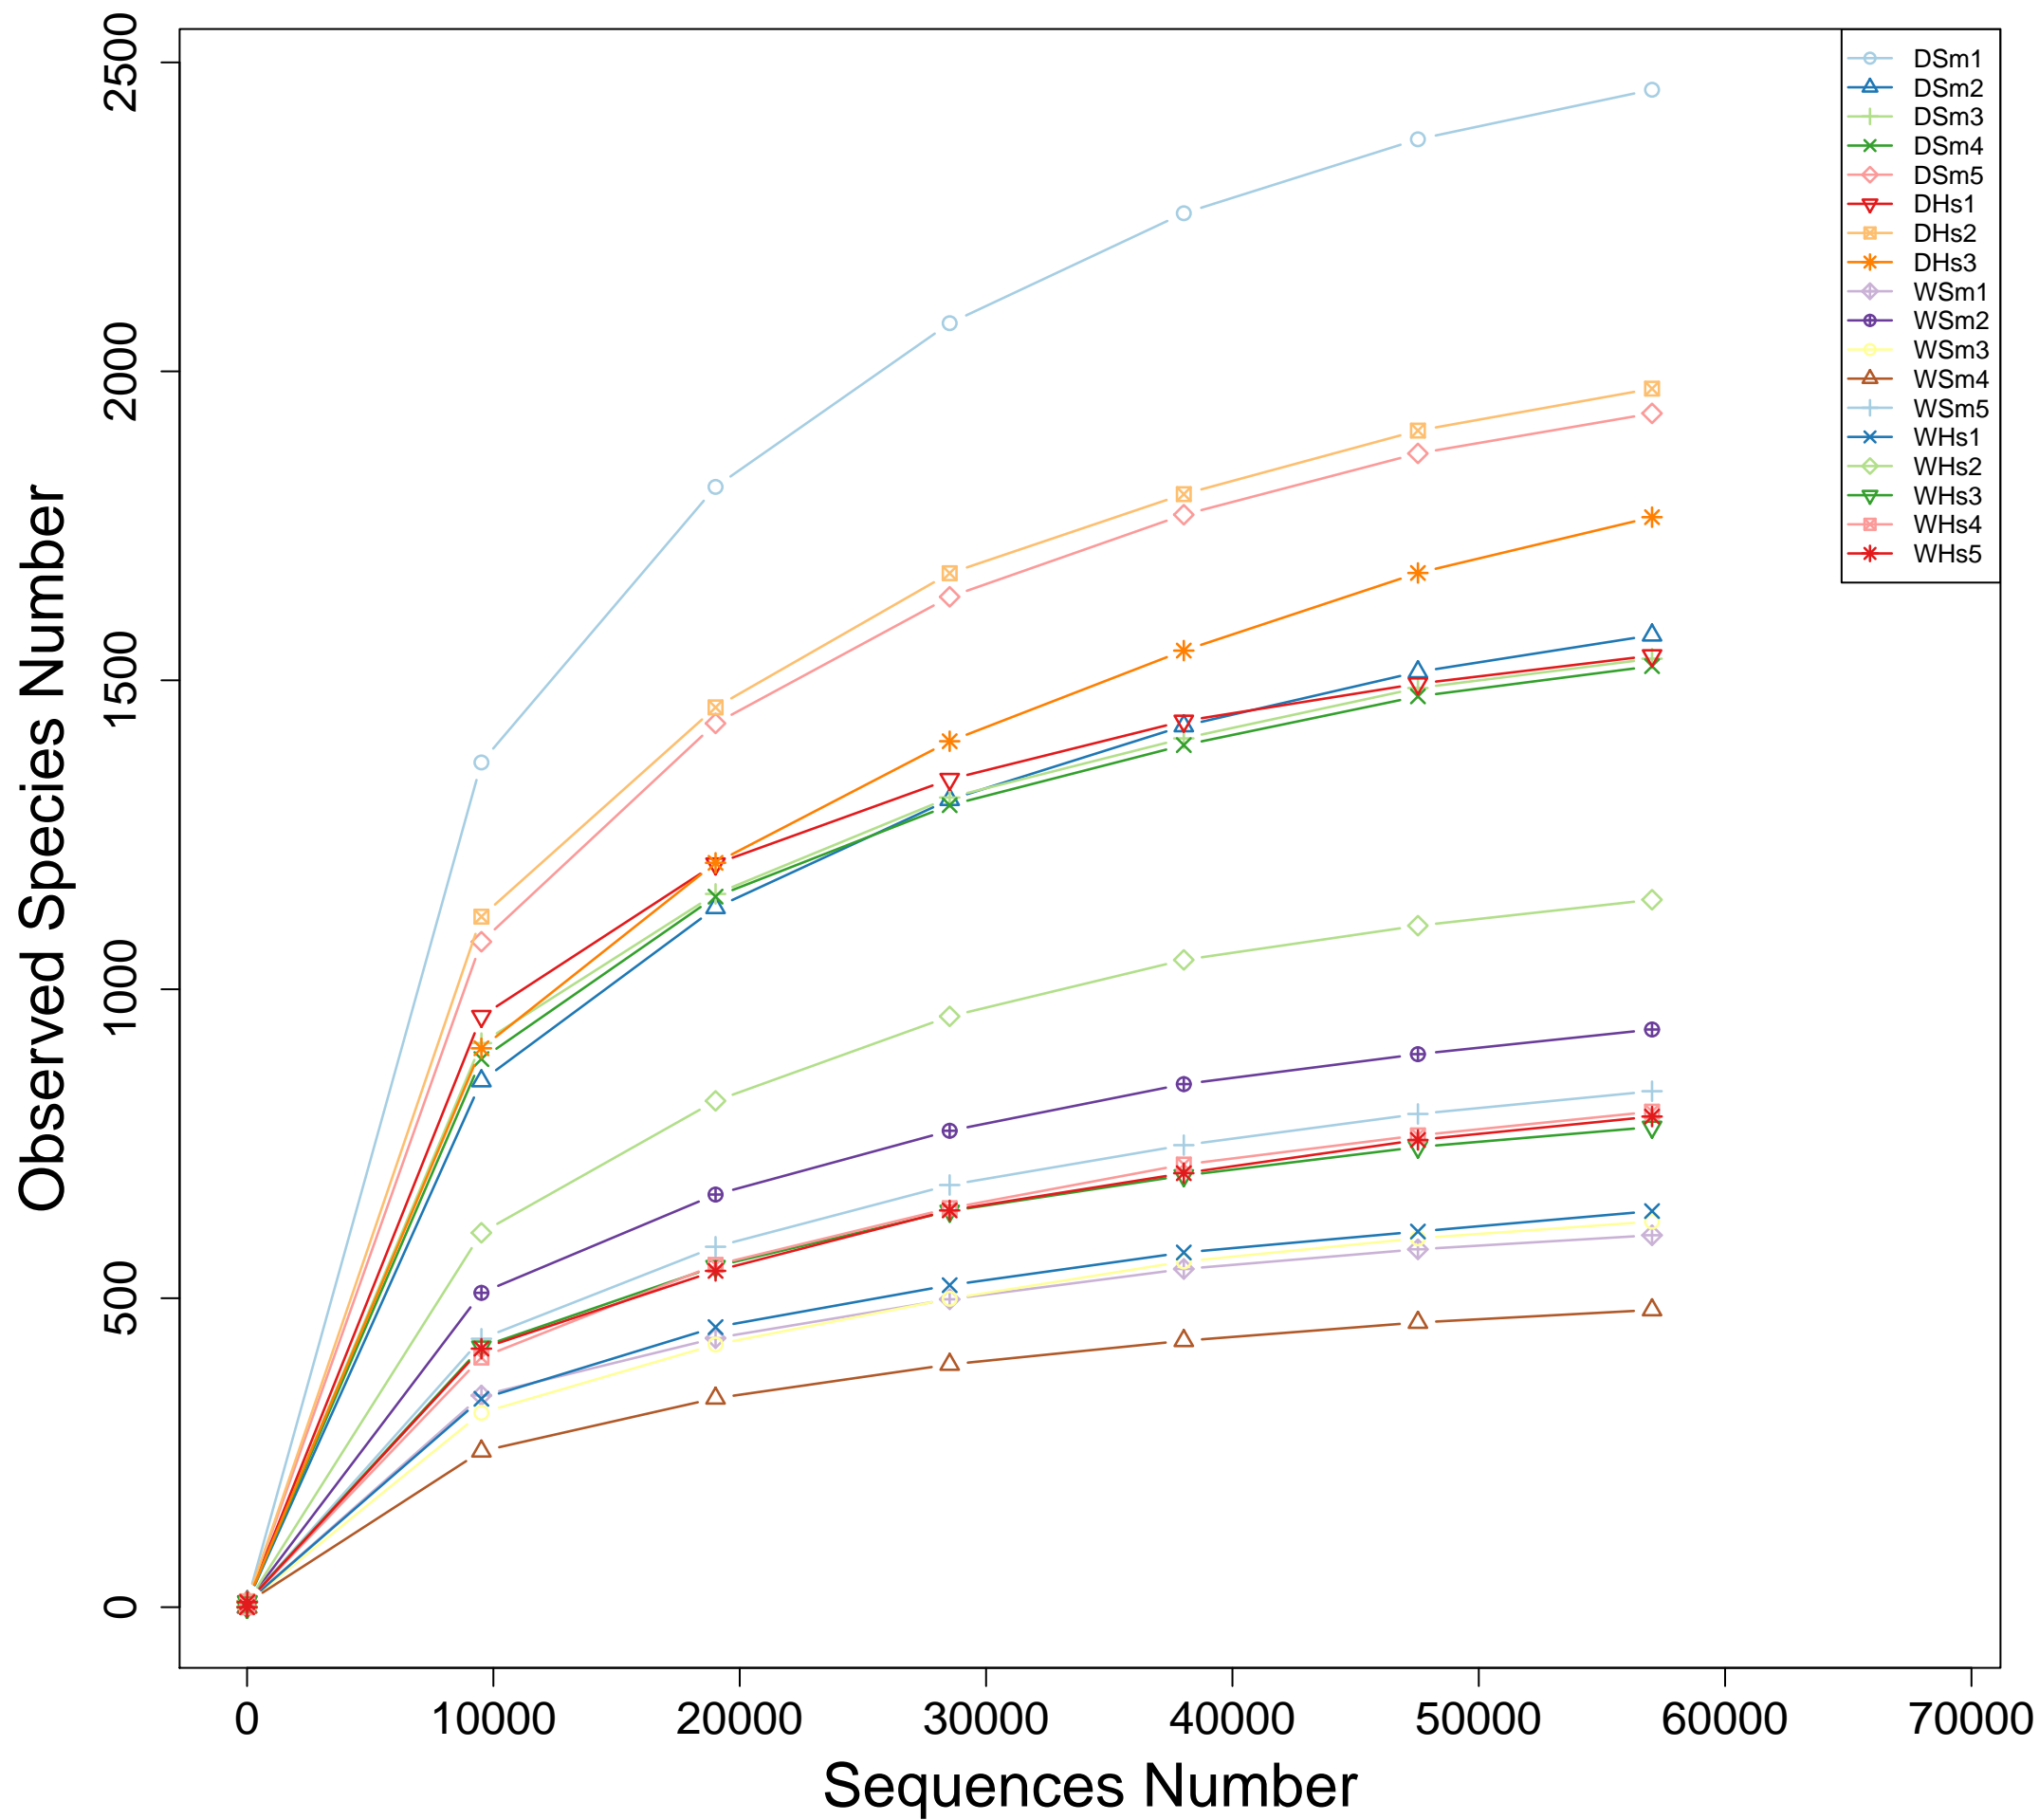

Supplement: s1 [file s1]
